# Supplementary material for: Loss of KDM4B impairs osteogenic differentiation of OMSCs and promotes oral bone aging
Source: PubMed Central journal article supplement (PMC9079076; doi:10.1038/s41368-022-00175-3), 2022-05-07

## Supplementary data

### Loss of KDM4B impairs osteogenic differentiation of OMSCs and promotes Oral Bone Aging

Running title: KDM4B controls oral bone aging

#### Fig. S1 Osteogenic and adipogenic differentiation potentials of BMSCs and OMSCs *in vitro*.

**a** ALP staining of BMSCs and OMSCs undergone osteogenic induction. Scale bar, 8 mm.

*n* = 3.

**b** Quantitative ALP activity assay of BMSCs and OMSCs upon osteogenic induction. *n* = 3.

**c** ARS staining of BMSCs and OMSCs undergone osteogenic induction. Scale bar, 8 mm.

*n* = 3.

**d** Quantification of calcium deposit in ECM of ARS staining of **c**. *n* = 3.

**e** Expression of osteogenic marker genes *Col1a1*, *Ibsp*, *Runx2*, *Sp7* and *Bglap* in BMSCs and OMSCs upon osteogenic induction. \**P* < 0.05; \*\**P* < 0.01. *n* = 3.

**f-g** Oil Red O staining of BMSCs and OMSCs upon adipogenic induction. Scale bar, 100  $\mu$ m. *n* = 3.

**h** qRT-PCR analysis of the expression of adipogenic marker genes *CD36*, *Cebpa*, *Fabp4*, and *Pparg* in BMSCs and OMSCs upon adipogenic induction. \*\**P* < 0.01. *n* = 3.

**Fig. S1**

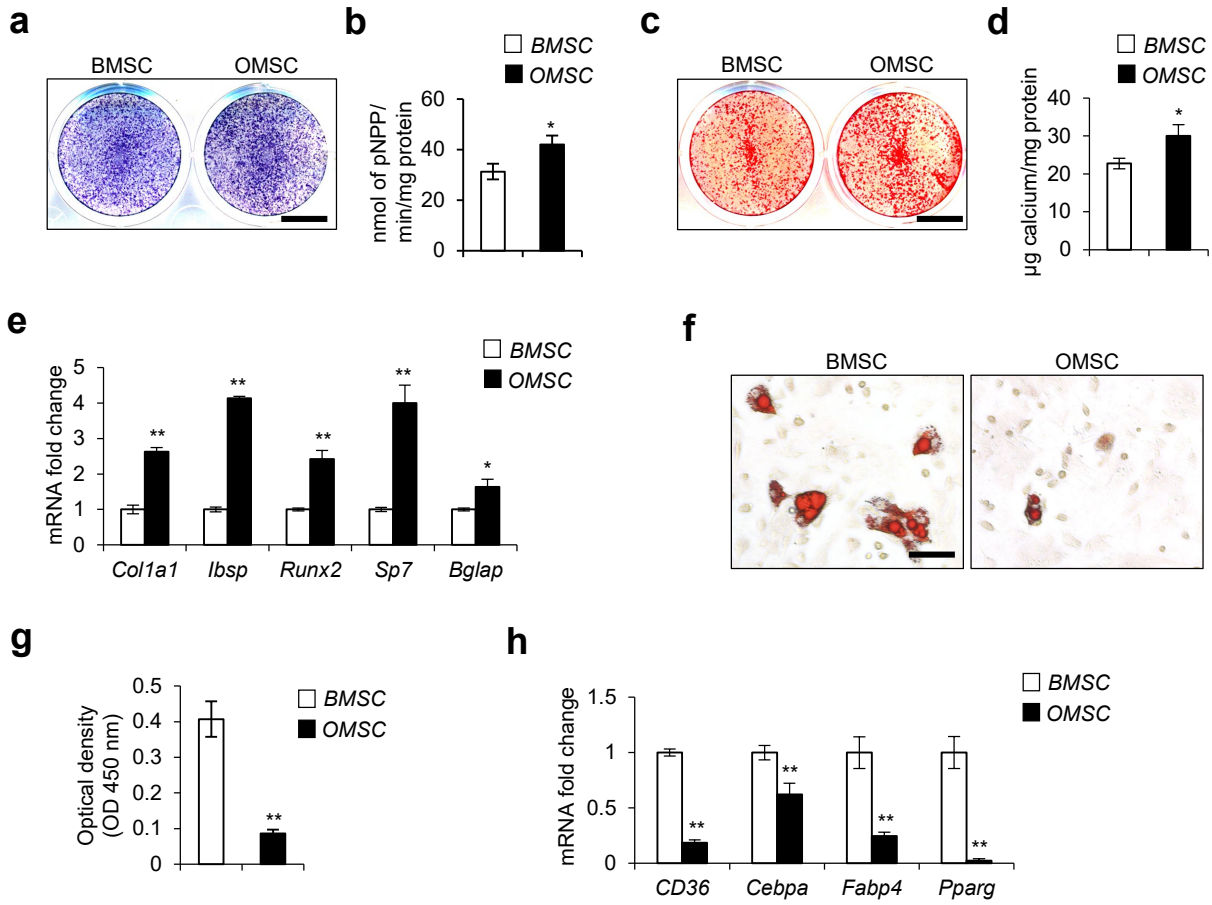

Supplement: 41368_2022_175_MOESM1_ESM.pdf [file 41368_2022_175_MOESM1_ESM.pdf]
